# Supplementary material for: Study of Risk Factors for Total Attack Rate and Transmission Dynamics of Norovirus Outbreaks, Jiangsu Province, China, From 2012 to 2018
Source: Front Med (Lausanne). 2022 Jan 7;8:786096. doi: 10.3389/fmed.2021.786096 (PMC8777030; doi:10.3389/fmed.2021.786096)
Supplement: Supplementary file 3 [file Table_1.XLSX]

## Sheet: Sheet1
ID	City	Exposed population	Cases	Death	Location type	Onset date of initial case	Area type	Transmission route	Genotyps
1	Wuxi City	9523	17	0	Common Colleges	2012-11-06	Urban areas	Person to person	GII.4[P31]
2	Wuxi City	562	17	0	Kindergarten	2014-11-25	Urban areas	Person to person	GII.4[P31]
3	Wuxi City	1747	35	0	Primary school and junior high school	2014-11-21	Rural areas	Person to person	GII.4[P31]
4	Nanjing City	2379	36	0	Primary school	2017-03-02	Urban areas	Person to person	GII.2[P16]
5	Changzhou City	1952	165	0	Primary school	2017-04-24	Urban areas	Person to person	GII.2[P16]
6	Changzhou City	1147	31	0	Primary school	2017-03-28	Rural areas	Person to person	GII.2[P16]
7	Yangzhou City	955	55	0	Kindergarten	2017-02-15	Rural areas	Person to person	GII.2[P16]
8	Yangzhou City	565	42	0	Primary school	2017-02-28	Rural areas	Person to person	GII.2[P16]
9	Wuxi City	2011	96	0	Senior high school	2017-03-14	Urban areas	Person to person	GII.2[P16]
10	Suzhou City	144	39	0	Kindergarten	2017-02-14	Rural areas	Person to person	GII.2[P16]
11	Nanjing City	14500	73	0	Common Colleges	2016-12-05	Urban areas	Water/food to person	GII.2[P16]
12	Nantong City	987	30	0	Primary school	2017-02-21	Rural areas	Person to person	GII.2[P16]
13	Suzhou City	890	53	0	Primary school	2017-03-01	Urban areas	Person to person	GII.2[P16]
14	Wuxi City	1784	40	0	Primary school and junior high school	2017-02-23	Rural areas	Person to person	GII.2[P16]
15	Wuxi City	2197	78	0	Primary school	2017-03-07	Urban areas	Person to person	GII.2[P16]
16	Suzhou City	893	34	0	Primary school	2017-02-13	Urban areas	Person to person	GII.2[P16]
17	Yancheng City	2496	60	0	Primary school	2017-02-16	Urban areas	Person to person	GII.2[P16]
18	Wuxi City	2212	63	0	Primary school	2017-02-12	Urban areas	Person to person	GII.2[P16]
19	Wuxi City	1050	90	0	Kindergarten	2017-02-20	Urban areas	Person to person	GII.2[P16]
20	Taizhou City	4675	73	0	Junior high school and senior high school	2017-02-12	Urban areas	Person to person	GII.2[P16]
21	Taizhou City	307	46	0	Kindergarten	2017-03-16	Rural areas	Person to person	GII.2[P16]
22	Yangzhou City	907	105	0	Primary school	2017-02-21	Rural areas	Person to person	GII.2[P16]
23	Yangzhou City	1285	193	0	Primary school	2017-03-10	Urban areas	Person to person	GII.2[P16]
24	Yangzhou City	3607	70	0	Primary school	2017-03-08	Urban areas	Person to person	GII.2[P16]
25	Yangzhou City	1694	180	0	Junior high school	2017-02-14	Urban areas	Person to person	GII.2[P16]
26	Yangzhou City	4454	78	0	Primary school	2017-01-04	Urban areas	Person to person	GII.2[P16]
27	Changzhou City	3031	68	0	Primary school	2014-12-02	Urban areas	Person to person	GII.17[P17]
28	Changzhou City	2032	23	0	Senior high school	2015-01-29	Urban areas	Person to person	GII.17[P17]
29	Changzhou City	1578	46	0	Primary school	2015-03-01	Urban areas	Water/food to person	GII.17[P17]
30	Wuxi City	2784	41	0	Primary school	2015-03-15	Urban areas	Person to person	GII.17[P17]
31	Wuxi City	2992	59	0	Primary school	2014-10-14	Urban areas	Person to person	GII.17[P17]
32	Wuxi City	2825	10	0	Primary school	2015-06-08	Urban areas	Person to person	GII.17[P17]
33	Wuxi City	821	16	0	Junior high school	2016-03-27	Urban areas	Person to person	GII.17[P17]
34	Wuxi City	525	20	0	Beadhouse	2015-01-29	Urban areas	Person to person	GII.17[P17]
35	Wuxi City	2568	57	0	Primary school	2014-12-15	Urban areas	Person to person	GII.17[P17]
36	Wuxi City	1787	20	0	Primary school	2015-12-06	Urban areas	Person to person	GII.17[P17]
37	Wuxi City	3214	19	0	Primary school	2015-04-01	Rural areas	Water/food to person	GII.17[P17]
38	Wuxi City	137	26	0	Company	2017-03-02	Rural areas	Water/food to person	GII.17[P17]
39	Yangzhou City	1467	54	0	Primary school	2015-03-10	Rural areas	Person to person	GII.17[P17]
40	Wuxi City	250	40	0	Company	2017-03-09	Urban areas	Person to person	GII.17[P17]
41	Wuxi City	933	40	0	Primary school	2014-11-05	Urban areas	Person to person	GII.17[P17]
42	Wuxi City	2000	57	0	Senior high school	2014-12-14	Urban areas	Person to person	GII.17[P17]
43	Wuxi City	1278	16	0	Secondary vocational school	2015-01-07	Urban areas	Person to person	GII.17[P17]
44	Wuxi City	3142	29	0	Primary school	2015-12-21	Urban areas	Water/food to person	GII.3[P12]
45	Wuxi City	1810	11	0	Senior high school	2015-09-09	Urban areas	Person to person	GII.3[P12]
46	Wuxi City	2640	17	0	Primary school	2016-03-22	Urban areas	Person to person	GII.3[P12]
47	Wuxi City	2912	25	0	Primary school	2017-02-14	Urban areas	Person to person	GII.3[P12]
48	Changzhou City	1180	66	0	Primary school and junior high school and Senior high school	2018-11-23	Urban areas	Person to person	GII.2[P16]
49	Nanjing City	1356	39	0	Primary school	2018-11-01	Rural areas	Person to person	GII.3[P12]
50	Nanjing City	1156	45	0	Primary school	2018-10-17	Urban areas	Person to person	GII.3[P12]
51	Suzhou City	764	31	0	Kindergarten	2018-10-31	Urban areas	Person to person	GII.2[P16]
52	Wuxi City	652	46	0	Primary school	2018-11-02	Urban areas	Person to person	GII.3[P12]
53	Changzhou City	1900	65	0	Primary school	2012-10-21	Urban areas	Person to person
54	Wuxi City	3615	13	0	Secondary vocational school	2014-09-04	Urban areas	Person to person	GII.4[P31]
55	Changzhou City	713	34	0	Kindergarten	2012-11-05	Urban areas	Person to person	GII.6[P7]
56	Changzhou City	2187	31	0	Primary school	2012-12-05	Urban areas	Person to person
57	Suzhou City	1751	74	0	Senior high school	2013-01-05	Urban areas	Water/food to person	GII.4[P31]
58	Suzhou City	2787	139	0	Junior high school and senior high school	2013-01-14	Rural areas	Water/food to person	GII.4[P31]
59	Wuxi City	2595	14	0	Senior high school	2013-01-15	Urban areas	Person to person	GII.3[P12]
60	Changzhou City	1901	45	0	Primary school	2013-04-23	Urban areas	Person to person	GII.1
61	Wuxi City	480	18	0	Educational services	2013-10-17	Urban areas	Person to person
62	Wuxi City	527	36	0	Beadhouse	2013-12-22	Urban areas	Person to person
63	Changzhou City	1433	26	0	Primary school	2014-02-25	Urban areas	Person to person
64	Wuxi City	1628	26	0	Primary school	2014-03-20	Urban areas	Person to person
65	Wuxi City	1813	46	0	Primary school	2014-05-12	Urban areas	Person to person
66	Changzhou City	299	24	0	Kindergarten	2014-10-21	Urban areas	Person to person
67	Wuxi City	1028	12	0	Primary school	2014-11-25	Urban areas	Person to person
68	Taizhou City	7270	12	0	Primary school and junior high school	2014-12-10	Urban areas	Person to person
69	Changzhou City	2876	53	0	Primary school	2014-12-24	Urban areas	Person to person	GII.17[P17]
70	Nanjing City	2217	169	0	Senior high school	2015-03-01	Urban areas	Person to person
71	Changzhou City	1665	62	0	Primary school and junior high school	2015-03-02	Urban areas	Person to person
72	Wuxi City	1733	17	0	Primary school	2015-03-09	Urban areas	Person to person	GII.17[P17]
73	Taizhou City	1330	37	0	Junior high school	2015-03-10	Urban areas	Person to person
74	Changzhou City	1957	24	0	Primary school	2015-03-11	Urban areas	Person to person
75	Wuxi City	468	31	0	Company	2015-04-12	Rural areas	Person to person
76	Taizhou City	295	22	0	Secondary vocational school	2015-04-22	Urban areas	Person to person
77	Taizhou City	3931	60	0	Primary school and junior high school	2015-09-17	Urban areas	Person to person
78	Changzhou City	1533	34	0	Primary school	2015-11-20	Urban areas	Person to person	GII.6[P7]
79	Nanjing City	1070	55	0	Primary school	2015-11-22	Urban areas	Person to person
80	Yancheng City	4564	83	0	Common Colleges	2015-12-09	Rural areas	Person to person
81	Wuxi City	712	16	0	Kindergarten	2016-02-22	Urban areas	Person to person	GI.2
82	Wuxi City	580	17	0	Kindergarten	2016-02-24	Urban areas	Person to person	GI.6
83	Changzhou City	620	60	0	Company	2016-03-06	Rural areas	Person to person	GI.6
84	Wuxi City	2135	34	0	Senior high school	2016-03-08	Urban areas	Person to person
85	Changzhou City	4820	29	0	Primary school and junior high school	2016-03-08	Urban areas	Person to person	GI.6
86	Suzhou City	50	33	0	Tour group	2016-03-24	Urban areas	Person to person
87	Wuxi City	2132	68	0	Junior high school	2016-10-08	Urban areas	Person to person
88	Wuxi City	386	13	0	Kindergarten	2016-10-12	Urban areas	Person to person	GII.2[P2]
89	Nanjing City	2415	61	0	Primary school	2016-12-04	Urban areas	Person to person
90	Wuxi City	1889	43	0	Primary school	2016-12-12	Urban areas	Person to person
91	Changzhou City	992	33	0	Primary school	2016-12-14	Rural areas	Person to person	GII.14[P7]
92	Changzhou City	612	26	0	Kindergarten	2017-02-13	Rural areas	Person to person	GII.2[P16]
93	Suzhou City	116	22	0	Primary school	2017-02-14	Rural areas	Person to person	GII.2[P16]
94	Changzhou City	780	24	0	Kindergarten	2017-02-14	Urban areas	Person to person	GII.2[P16]
95	Yangzhou City	2174	55	0	Primary school	2017-02-20	Urban areas	Person to person
96	Yangzhou City	1928	68	0	Primary school	2017-02-20	Urban areas	Person to person
97	Yangzhou City	388	22	0	Primary school	2017-02-21	Rural areas	Person to person	GII.2[P16]
98	Changzhou City	2779	194	0	Common Colleges	2017-02-26	Rural areas	Person to person	GII.2[P16]
99	Yancheng City	2186	29	0	Primary school	2017-02-26	Urban areas	Person to person	GII.2[P16]
100	Changzhou City	1353	33	0	Junior high school	2017-02-27	Urban areas	Person to person	GII.2[P16]
101	Suqian City	392	18	0	Kindergarten	2017-03-07	Urban areas	Person to person	GII.2[P16]
102	Changzhou City	1922	145	0	Senior high school	2017-03-19	Urban areas	Person to person	GII.2[P16]
103	Wuxi City	1167	24	0	Primary school	2017-03-24	Urban areas	Person to person	GII.2[P16]
104	Wuxi City	1288	53	0	Junior high school	2017-03-27	Rural areas	Person to person	GII.2[P16]
105	Yangzhou City	536	59	0	Junior high school	2017-03-29	Rural areas	Person to person
106	Suzhou City	1700	221	0	Primary school	2017-03-30	Rural areas	Water/food to person
107	Nanjing City	1213	66	0	Secondary vocational school	2017-04-08	Urban areas	Person to person
108	Changzhou City	977	22	0	Primary school	2017-04-10	Rural areas	Person to person	GII.2[P16]
109	Zhenjiang City	807	49	0	Primary school and junior high school	2017-04-13	Rural areas	Person to person
110	Zhenjiang City	416	28	0	Kindergarten	2017-04-19	Rural areas	Person to person
111	Changzhou City	2044	26	0	Primary school	2017-04-20	Urban areas	Person to person	GII.2[P16]
112	Nanjing City	2020	111	0	Primary school	2017-04-26	Rural areas	Person to person
113	Yangzhou City	1313	46	0	Primary school	2017-05-16	Urban areas	Person to person
114	Wuxi City	596	62	0	Kindergarten	2017-05-18	Urban areas	Person to person
115	Suzhou City	1204	79	0	Primary school	2017-05-21	Urban areas	Person to person
116	Lianyungang City	354	20	0	Kindergarten	2017-06-09	Urban areas	Person to person	GII.2[P16]
117	Taizhou City	3300	14	0	Primary school	2017-06-13	Urban areas	Person to person
118	Wuxi City	1691	25	0	Primary school	2017-06-13	Rural areas	Person to person	GII.2[P16]
119	Xuzhou City	4000	117	0	Senior high school	2017-09-01	Urban areas	Person to person	GI.2
120	Xuzhou City	3050	129	0	Junior high school	2017-09-05	Urban areas	Person to person	GII.17[P17]
121	Yangzhou City	951	32	0	Junior high school	2017-10-20	Rural areas	Person to person	GII.2[P16]
122	Nanjing City	3528	73	0	Primary school	2017-11-04	Urban areas	Person to person
123	Taizhou City	2355	16	0	Primary school	2017-11-07	Rural areas	Person to person	GII.2[P16]
124	Changzhou City	3328	32	0	Primary school	2017-11-13	Urban areas	Person to person	GII.2[P16]
125	Wuxi City	2477	133	0	Senior high school	2017-11-18	Urban areas	Person to person	GII.2[P16]
126	Zhenjiang City	3534	91	0	Primary school	2017-11-20	Urban areas	Person to person
127	Wuxi City	693	60	0	Primary school	2017-11-21	Urban areas	Person to person	GII.2[P16]
128	Suzhou City	990	65	0	Junior high school	2017-11-21	Urban areas	Person to person	GII.2[P16]
129	Wuxi City	1722	32	0	Senior high school	2017-11-26	Urban areas	Person to person
130	Zhenjiang City	5961	81	0	Primary school	2017-11-27	Urban areas	Person to person
131	Suqian City	570	10	0	Kindergarten	2017-11-27	Urban areas	Person to person
132	Suzhou City	368	12	0	Primary school	2017-11-27	Urban areas	Person to person
133	Nanjing City	530	32	0	Hotel	2017-11-29	Urban areas	Person to person
134	Changzhou City	1228	24	0	Junior high school	2017-12-01	Urban areas	Person to person	GII.2[P16]
135	Changzhou City	2800	90	0	Primary school and junior high school	2017-12-06	Urban areas	Person to person	GII.2[P16]
136	Zhenjiang City	1820	73	0	Primary school	2017-12-08	Urban areas	Person to person
137	Changzhou City	1978	21	0	Primary school	2017-12-08	Urban areas	Person to person	GII.2[P16]
138	Wuxi City	637	31	0	Kindergarten	2017-12-12	Urban areas	Person to person
139	Changzhou City	1781	49	0	Junior high school	2017-12-16	Urban areas	Person to person	GII.2[P16]
140	Changzhou City	4000	209	0	Common Colleges	2017-12-17	Urban areas	Person to person	GII.2[P16]
141	Wuxi City	1884	21	0	Primary school	2017-12-18	Urban areas	Person to person	GII.2[P16]
142	Suzhou City	295	21	0	Kindergarten	2017-12-25	Urban areas	Person to person	GII.2[P16]
143	Yancheng City	3787	20	0	Primary school	2017-12-26	Urban areas	Person to person
144	Changzhou City	3357	21	0	Primary school	2017-12-27	Rural areas	Person to person
145	Changzhou City	2752	27	0	Secondary vocational school	2018-01-15	Urban areas	Person to person	GII.2[P16]
146	Nanjing City	1000	52	0	Primary school	2018-02-28	Urban areas	Person to person
147	Suzhou City	1743	38	0	Primary school	2018-02-28	Urban areas	Person to person
148	Wuxi City	1950	22	0	Primary school	2018-03-04	Urban areas	Person to person	GII.2[P16]
149	Huai'an City	1458	32	0	Primary school	2018-03-06	Rural areas	Person to person
150	Changzhou City	3518	236	0	Common Colleges	2018-03-12	Rural areas	Person to person	GII.2[P16]
151	Nanjing City	3888	40	0	Primary school	2018-03-14	Urban areas	Person to person	GII.2[P16]
152	Changzhou City	618	22	0	Kindergarten	2018-03-16	Rural areas	Person to person
153	Nanjing City	1375	62	0	Primary school	2018-03-29	Urban areas	Person to person	GII.3[P12]
154	Nantong City	583	14	0	Primary school	2018-04-09	Urban areas	Person to person
155	Nantong City	638	18	0	Primary school	2018-04-10	Rural areas	Person to person	GI.3[P13]
156	Changzhou City	2163	34	0	Primary school	2018-04-11	Urban areas	Person to person	GI.2P[2]
157	Suzhou City	3755	72	0	Primary school	2018-04-17	Urban areas	Person to person
158	Nantong City	716	18	0	Kindergarten	2018-04-18	Urban areas	Person to person	GII.2[P16]
159	Changzhou City	1578	32	0	Senior high school	2018-04-25	Rural areas	Person to person	GI.2P[2]
160	Suqian City	13000	30	0	Common Colleges	2018-05-28	Urban areas	Person to person	GI.6[P11]
161	Changzhou City	1476	33	0	Primary school	2018-06-06	Rural areas	Person to person	GII.2[P16]
162	Wuxi City	1795	53	0	Senior high school	2018-06-20	Urban areas	Person to person	GII.2[P16]
163	Wuxi City	2555	117	0	Senior high school	2018-09-04	Rural areas	Person to person	GII.13[P16]
164	Wuxi City	1857	47	0	Primary school	2018-09-10	Urban areas	Person to person	GII.2[P16]
165	Wuxi City	1755	80	0	Primary school	2018-10-08	Urban areas	Person to person	GII.2[P16]
166	Lianyungang City	1250	29	0	Primary school	2018-10-09	Urban areas	Person to person	GII.2[P16]
167	Changzhou City	1921	25	0	Primary school	2018-10-15	Urban areas	Person to person	GII.2[P16]
168	Wuxi City	208	23	0	Kindergarten	2018-10-18	Urban areas	Person to person	GII.3[P12]
169	Wuxi City	725	22	0	Primary school	2018-10-18	Rural areas	Person to person
170	Changzhou City	1720	20	0	Primary school	2018-10-19	Urban areas	Person to person	GII.2[P16]
171	Wuxi City	1955	26	0	Primary school	2018-10-21	Urban areas	Person to person	GII.2[P16]
172	Nanjing City	210	24	0	Hospital	2018-10-21	Urban areas	Person to person	GII.17[P17]
173	Wuxi City	2469	51	0	Primary school	2018-10-22	Urban areas	Person to person	GII.2[P16]
174	Nanjing City	320	29	0	Kindergarten	2018-10-24	Urban areas	Person to person	GII.2[P16]
175	Suzhou City	2106	21	0	Primary school	2018-10-25	Urban areas	Person to person
176	Nanjing City	340	31	0	Kindergarten	2018-10-28	Urban areas	Person to person	GII.6[P7]
177	Yangzhou City	1744	91	0	Junior high school	2018-10-30	Urban areas	Person to person	GII.2[P16]
178	Changzhou City	1543	24	0	Primary school	2018-10-30	Urban areas	Person to person	GII.2[P16]
179	Taizhou City	785	25	0	Primary school	2018-10-30	Urban areas	Person to person
180	Suzhou City	1337	33	0	Primary school	2018-10-30	Urban areas	Person to person	GII.2[P16]
181	Wuxi City	2025	38	0	Primary school	2018-11-01	Urban areas	Person to person	GII.2[P16]
182	Taizhou City	2600	29	0	Primary school	2018-11-01	Rural areas	Person to person	GII.2[P16]
183	Zhenjiang City	2629	35	0	Common Colleges	2018-11-01	Urban areas	Person to person	GII.2[P16]
184	Yangzhou City	1415	72	0	Primary school	2018-11-02	Urban areas	Person to person	GII.2[P16]
185	Zhenjiang City	2201	31	0	Senior high school	2018-11-02	Urban areas	Person to person	GII.2[P16]
186	Nanjing City	1696	35	0	Primary school	2018-11-02	Urban areas	Person to person	GII.2[P16]
187	Nanjing City	1779	26	0	Primary school	2018-11-03	Rural areas	Person to person	GII.2[P16]
188	Huai'an City	3483	38	0	Junior high school	2018-11-07	Urban areas	Person to person
189	Changzhou City	2728	196	0	Primary school	2018-11-07	Urban areas	Person to person	GII.2[P16]
190	Changzhou City	3411	27	0	Primary school	2018-11-07	Urban areas	Person to person	GII.2[P16]
191	Wuxi City	3010	53	0	Primary school	2018-11-09	Urban areas	Person to person	GII.2[P16]
192	Yangzhou City	2650	91	0	Secondary vocational school	2018-11-10	Urban areas	Person to person	GII.3[P12]
193	Yancheng City	1688	62	0	Junior high school	2018-11-12	Rural areas	Person to person	GII.2[P16]
194	Changzhou City	974	27	0	Primary school	2018-11-21	Rural areas	Person to person	GII.2[P16]
195	Wuxi City	250	28	0	Primary school	2018-11-22	Rural areas	Person to person
196	Changzhou City	2692	141	0	Senior high school	2018-11-29	Urban areas	Person to person	GII.2[P16]
197	Wuxi City	1026	42	0	Senior high school	2018-12-04	Urban areas	Person to person	GII.2[P16]
198	Huai'an City	1880	24	0	Junior high school	2018-12-12	Urban areas	Person to person
199	Wuxi City	2680	109	0	Senior high school	2018-12-14	Urban areas	Person to person
200	Yancheng City	2539	80	0	Senior high school	2018-12-15	Urban areas	Person to person	GII.2[P16]
201	Taizhou City	608	34	0	Primary school	2018-12-17	Urban areas	Person to person
202	Yangzhou City	1415	21	0	Primary school	2018-12-18	Urban areas	Person to person	GII.2[P16]
203	Nanjing City	2100	21	0	Primary school	2018-12-19	Urban areas	Person to person
204	Taizhou City	2300	24	0	Senior high school	2018-12-20	Urban areas	Person to person
205	Wuxi City	1484	22	0	Primary school	2018-12-21	Urban areas	Person to person
206	Taizhou City	102	22	0	Kindergarten	2018-12-28	Urban areas	Person to person
